# Supplementary material for: Mild Traumatic Brain Injury Induces Mitochondrial Calcium Overload and Triggers the Upregulation of NCLX in the Hippocampus
Source: MDPI journal article supplement (doi:10.3390/antiox12020403), 2023-02-07
Supplement: s1 [file s1]

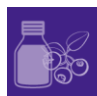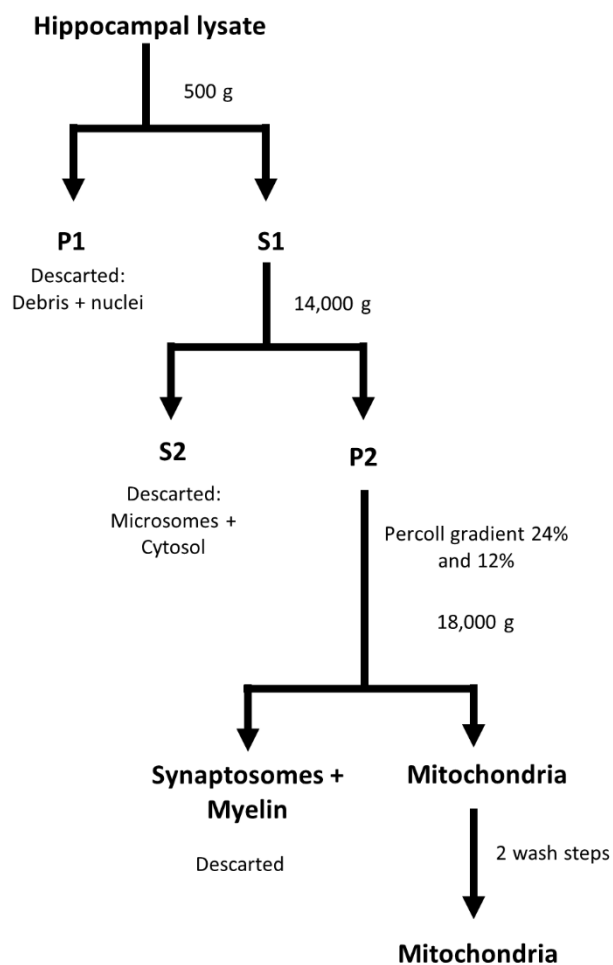

**Supplementary Figure S1. Methodological figure.** Scheme of mitochondria isolation process according to the methods sections (methods 2.4).

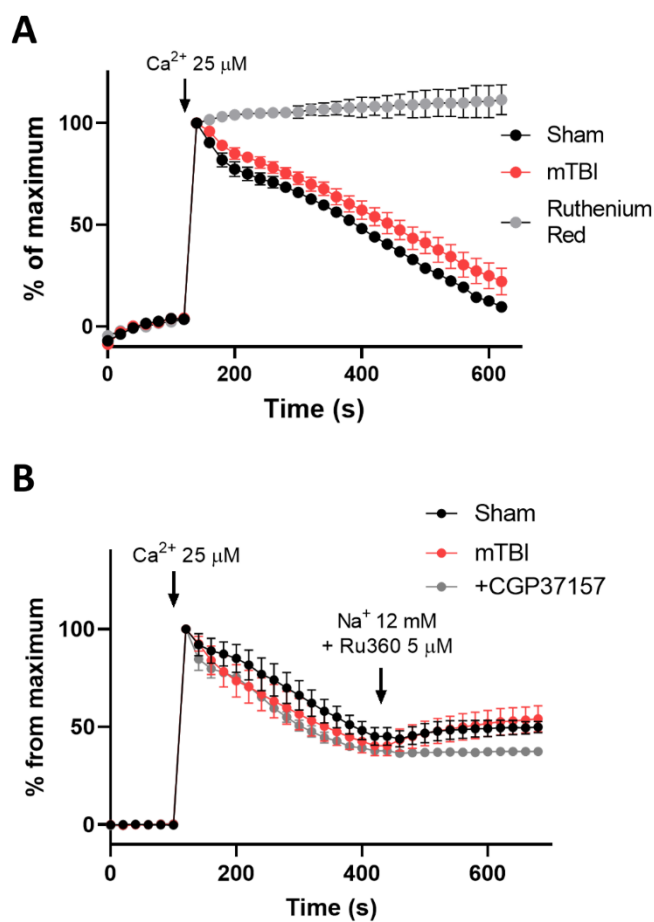

**Supplementary Figure S2. Extended Data Figure 3.** (A) Traces of calcium influx with error bars. (B) Traces of calcium influx and efflux with error bars.

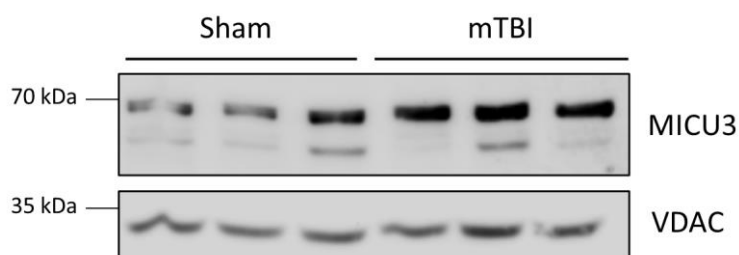

**Supplementary Figure S3.** Immunoblot of MICU3 of mTBI-derived isolated mitochondria. The immunoblot was performed with new additional independent experiments to assess statistics.

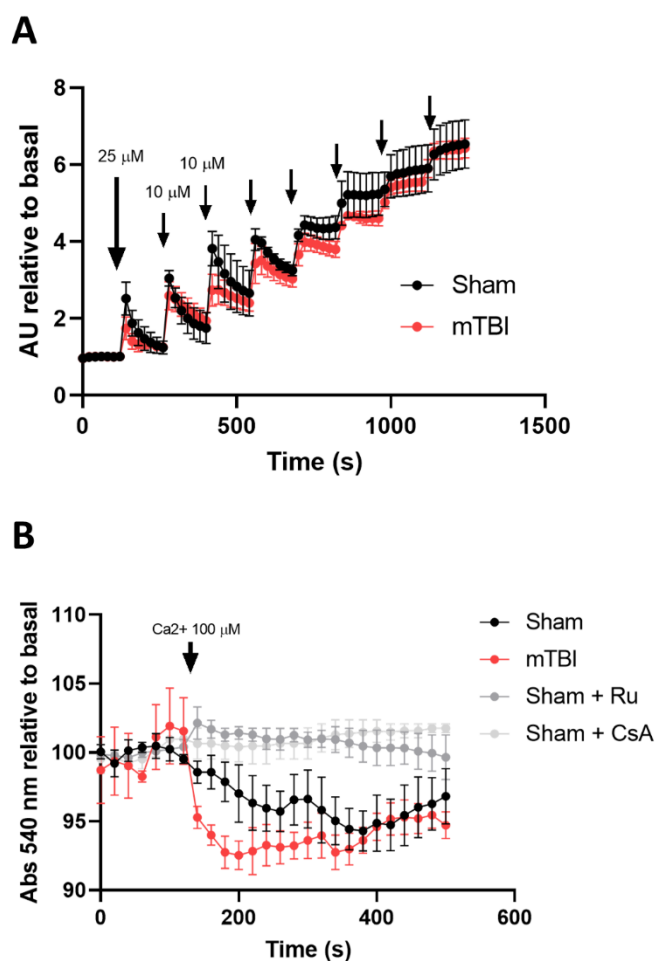

**Supplementary Figure S4. Extended Data Figure 5.** (A) Traces of calcium retention capacity with error bars. (B) Traces of swelling assay with error bars.

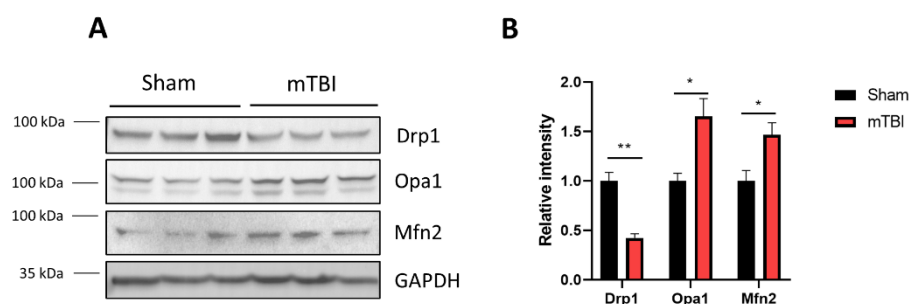

**Supplementary Figure S5. mTBI induces upregulation of fusion proteins and decrease Drp1 protein levels.** (A) Immunoblot of proteins involved in fission/fusion cycle. It shows the fission protein Drp1 and fusion proteins Opa1 and Mfn2.  $n = 3$ . (B) Quantification of immunoblots showed in A. Unpaired two-tailed t-test. For Drp1  $t = 5.978$ ,  $p = 0.0039$ ; for Opa1  $t = 3.325$ ,  $p = 0.0292$ , for Mfn2  $t = 2.874$ ,  $p = 0.0453$ . \*  $p < 0.05$ . \*\*  $p < 0.01$ .
